# Supplementary material for: Programmable regulation of translation by harnessing the CRISPR-Cas13 system
Source: Royal Society of Chemistry journal article supplement (doi:10.1039/d3cc00058c), 2023-01-01
Supplement: d3cc00058c1.pdf [file d3cc00058c1.pdf]

## **SUPPLEMENTARY MATERIAL**

### **METHODS**

**sgRNA design.** The complementary DNA sequence of the direct repeat that is recognized by dCas13a from *L. wadei* is GATTTAGACTACCCCAAAAACGAAGGGGACTAAAAC [1]. The corresponding spacer is 30 nucleotides long and is located in the 3' end. A new direct repeat after the spacer and before the transcription terminator provokes the maturation of the sgRNA by dCas13a (as the wild-type protein has two distinct RNase activities) [2] to generate clean spacers. Different genetic architectures for sgRNA expression were constructed and assayed (without additional direct repeat and with a ribozyme after the spacer). The spacers of the sgRNAs were simply taken as the reverse complement of the targeted sequences. We designed sgRNAs to target the *sfGFP* and *eBFP2* genes. In the case of activation of translation initiation, the spacer was designed to induce a conformational change in the 5' UTR of the target mRNA [3]. Here, the transcription terminator from the *E. coli* gene *rmC* was employed, as done elsewhere [4].

**Genetic constructions.** The complete DNA synthesis of *dCas13a* from *L. wadei* (having the mutations R474A and R1046A, which disable the RNA-guided single-stranded RNA cleavage activity) [1] was done by GenScript (codon-optimized for *E. coli*), then cloned under the control of the T5-*lac* promoter into a plasmid with origin of replication pBR322 and resistance to ampicillin (pQE-60). The different sgRNAs were synthesized as linear DNA fragments by IDT or Sigma, subsequently cloned into a plasmid with origin of replication pSC101(E93G) and resistance to kanamycin [4]. However, for *in vivo* experiments, the sgRNAs were cloned into the plasmid harboring the *dCas13a* digesting with NheI. The *sfGFPs* with different 5' UTRs were synthesized as linear DNA fragments by IDT, which were then cloned into a plasmid with origin of replication pUC and

resistance to ampicillin (pUCIDT) for *in vitro* experiments and into a plasmid with origin of replication p15A and resistance to chloramphenicol (p15Cat) for *in vivo* experiments [5]. The *eBFP2s* with different 5' UTRs were synthesized as plasmids by IDT with origin of replication pUC and resistance to ampicillin (pUCIDT). All sgRNAs, sfGFPs, and eBFP2s were expressed from a constitutive promoter (J23119). In addition, *E. coli* Dh5 $\alpha$  was used as a strain for cloning purposes. Plasmids were amplified through overnight bacterial cultures in LB at 37 °C and 220 rpm (Dh5 $\alpha$  for the plasmids encoding sgRNAs or sfGFPs and MG1655-Z1 for the plasmid encoding dCas13a). Ampicillin was used at 100  $\mu$ g/mL, kanamycin at 50  $\mu$ g/mL, and chloramphenicol at 34  $\mu$ g/mL. Plasmids were then retrieved by miniprep (Thermo), followed by purification with a PureLink kit (Thermo). Finally, they were quantified in a Nanodrop (Thermo).

**RNA folding.** The cofold routine from the ViennaRNA webserver [6] was used to predict the  $\Delta$ G value for the different sgRNA-mRNA interactions. This was run with default parameters, except by setting the temperature to 29 °C. To get the  $\Delta$ G distributions for each mechanism of translation control, random 5' UTRs were generated with the inverse folding routine with sequence and structural constraints.

**Cell-free expression.** *In vitro* transcription-translation was run with the myTXTL protein expression kit (Arbor), based on an *E. coli* cell extract, amino acids, and an energy buffer [7]. Low DNA binding 1.5 mL tubes (Sarstedt) were used as reaction containers, with 9  $\mu$ L of  $\sigma$ 70 master mix and an appropriate volume of each plasmid, then adjusting with nuclease-free water to 12  $\mu$ L. To assess the repression or activation of sfGFP, the plasmid encoding the sfGFP was placed at 2 nM, the plasmid encoding the dCas13a at 3 nM, and the plasmid encoding the sgRNA at 6 nM. To assess the orthogonal regulation of eBFP2, the plasmid encoding the eBFP2 or sfGFP was placed at 2 nM in the case of repression

and 3 nM in the case of activation, the plasmid encoding the sgRNA at 10 nM in the case of repression and 6 nM in the case of activation, and the plasmid encoding the dCas13a always at 3 nM. These concentrations may need adjustment depending on the expression kit. The tubes were incubated for 16 h at 29 °C in a stove (Incudigit; Selecta). Reactions were stopped by placing the tubes on ice. Some marginal evaporation was observed, but no condensation on the lid. Reactions were done in triplicate.

**Fluorescence quantification.** Incubated samples of cell-free expression (about 12 µL) were transferred to a microplate (384 wells, black, clear bottom; Falcon) for characterization. The microplate was assayed in a fluorometer (Varioskan Lux; Thermo) to measure green fluorescence (excitation at 485 nm, emission at 535 nm). The mean background value of fluorescence corresponding to the cell extract expressing only dCas13a was subtracted to correct the signals and get an estimate of protein expression.

**Molecular beacons.** Two different RNA beacons (folding into a stem-loop structure) were designed [8], one to prove the interaction associated with the repression of initiation and another the activation of initiation. A fluorescent dye (fluorescein) was placed in the 5' end and a dark quencher (Iowa black) in the 3' end. To reach the appropriate folding, RNA beacons were first heated for 2 min at 95 °C and then slowly cooled to 25 °C. On incubated samples of cell-free expression (of dCas13a and sgRNA only), 250 nM of RNA beacon was added. Samples were incubated for additional 5 min at 29 °C and then quantified.

**Bacterial colony assays.** LB-agar plates seeded with *E. coli* MG1655-Z1 cells co-transformed with suitable plasmids (a plasmid harboring the *dCas13a* and sgRNA and another plasmid harboring the *sfGFP*) were grown overnight at 37 °C. Glucose (0.4%) and

lactose (1 mM) were used as supplements. The plates were irradiated with blue light and images were acquired with a 2.8 Mpixel camera with a filter for green fluorescence in a light microscope (Leica MSV269). The commercial software provided by Leica was used to adjust the visualization of the differential fluorescence among plates. The fluorescence intensity of the colonies was quantified with Fiji [9] with appropriate background subtraction.

## TECHNICAL NOTES

**Note S1.** It would be reasonable to accept that the expression of dCas13a would have some nonspecific, but negative effect on sfGFP expression as a result of the competition for myTXTL resources. Our results are not conclusive in this matter, as we also noticed variability in the fluorescence measurements, especially when the plasmid encoding dCas13a was not added to the reaction.

**Note S2.** We explored the *in vivo* performance of the designer systems with liquid cultures in exponential phase (using minimal M9 medium), but we noted growth defects and marginal regulation, especially in the case of repression. The expected high activity of the ribosomes in exponential phase and the potential existence of unforeseen binding regions in the host transcriptome might explain this behavior. Further work should be conducted to study which genetic background (type of strain) and environmental conditions (carbon source, temperature, *etc.*) are more favorable for the CRISPR-Cas13 system in *E. coli* or even other bacterial cells.

## REFERENCES

1. Abudayyeh OO, Gootenberg JS, Essletzbichler P, Han S, Joung J, Belanto JJ, Verdine V, Cox DBT, Kellner MJ, Regev A, Lander ES, Voytas DF, Ting AY, Zhang F (2017) RNA targeting with CRISPR-Cas13. *Nature* 550, 280-284.
2. East-Seletsky A, O'Connell MR, Knight SC, Burstein D, Cate JH, Tjian R, Doudna JA (2016) Two distinct RNase activities of CRISPR-C2c2 enable guide-RNA processing and RNA detection. *Nature* 538, 270-273.
3. Green AA, Silver PA, Collins JJ, Yin P (2014) Toehold switches: De-novo-designed regulators of gene expression. *Cell* 159, 925-939.
4. Rosado A, Cordero T, Rodrigo G (2018) Binary addition in a living cell based on riboregulation. *PLoS Genet* 14, e1007548.
5. Ortolá B, Cordero T, Hu X, Daròs JA (2021) Intron-assisted, viroid-based production of insecticidal circular double-stranded RNA in *Escherichia coli*. *RNA Biol* 18, 1846-1857.
6. Gruber AR, Lorenz R, Bernhart SH, Neuböck R, Hofacker IL (2008) The Vienna RNA Websuite. *Nucleic Acids Res* 36, W70-W74.
7. Garamella J, Marshall R, Rustad M, Noireaux V (2016) The all *E. coli* TX-TL toolbox 2.0: a platform for cell-free synthetic biology. *ACS Synth Biol* 5, 344-355.
8. Tyagi S, Kramer FR (1996) Molecular beacons: probes that fluoresce upon hybridization. *Nat Biotechnol* 14, 303-308.
9. Schindelin J, Arganda-Carreras I, Frise E, Kaynig V, Longair M, Pietzsch T, Preibisch S, Rueden C, Saalfeld S, Schmid B, Tinevez JY, White DJ, Hartenstein V, Eliceiri K, Tomancak P, Cardona A (2012) Fiji: an open-source platform for biological-image analysis. *Nat Methods* 9, 676-682.

## SEQUENCES

We provide the nucleotide sequences of the different elements that we used in this work.

> Coding region for dCas13a (from *L. wadei*, codon-optimized for *E. coli*):

```
ATGAAAGTAACTAAAGTTCGATGGTATCAGTCATAAAAAGTATATCGAGGAAGGAAAAGTTGGTGAAGTCAACAAGTGAAGA
GAATCGCACGTCGGAACGTTTATCCGAATTATTAAGTATCCGCTTAGACATTTACATCAAGAATCCGGATAACGCATCAG
AAGAGGAAAATCGTATCCGCCGTGAGAACTTGAAAAAATCTTTAGTAACAAAGTACTGCATTTAAAGGACTCCGTGCTT
TACCTGAAGAATCGCAAGGAGAAAAATGCAGTCCAGGATAAAAACTACTCAGAAGAAGACATCAGTGAATACGACTTAAA
GAACAAGAACTCGTTCTCCGTGTTGAAGAAGATTTTACTTAAACGAAGACGTAAATAGCGAAGAGCTGGAGATTTTCCGTA
AAGACGTGGAGGCGAAGCTGAATAAGATCAACAGTCTTAAAGTATTCCTTTGAGGAGAATAAAGCCAACATATCAGAAAAATC
AATGAAAACAATGTAGAAAAGGTTGGCGGAAAGTCTAAGCGCAATATCATCTATGATTACTATCGCGAGTCTGCGAAAACG
CAATGATTACATCAACAATGTACAGGAGGCCCTTCGACAAACTGTATAAGAAAGAGGATATTGAAAAATTGTTCTTCCTGA
TCGAAAAATCAAAGAAGCATGAAAAATATAAGATCCGCGAGTACTATCACAAAATTATCGGCCGTAAAAACGATAAAGAG
AATTTTCGCGAAGATCATTTATGAAGAAATTCAAAATGTAACAATATCAAGGAACCTTATTGAAAAGATCCAGATATGTC
GGAACCTTAAAAAAGCCAGGTATTCATAAATACTACTTTAGATAAGGAAGAATTAATGATAAGAACATCAAATACGCCT
TTTGTCAATTCGTCGAAATGAGATGTGCGCAGCTTTTAAAGAATTACGTCTACAAACGTTTATCTAATATCTCCAACGAC
AAAATCAAGCGCATCTTCGAGTATCAGAACTTAAAGAAATTAATCGAAAACAAGCTGCTGAATAAACTGGATACCTATGT
TCGCAACTGCGGTAAATATAAATTATATCTGCAGTTCGTTGAGATGCAACCTCGGATTTTATTGCTCGTAACCGTCAAA
ACGAGGCTTTCTTCGCAATATTTATCGGGTATCTGTCAGTGGCATATTTTAGCCTGCGCAATATTTGGAGACCGAAAAT
GAAAACGGTATCACCGTTCGATGCGCGGCAAGACTGTAAAGAACAACAAGGGGAGGAGAAGTATGTGTCAGGAGAAGT
AGATAAGATTTATAATGAAAACAAACAGAACGAAGTAAAGGAAAACCTTGAATGTTTTATTTCGTACGATTTTAAATATGG
ATAATAAAAATGAGATCGAGGACTTTTTTGTCTAATATTGATGAGGCAATCTCTAGCATTGCGCACGGGATCGTGCACCTT
AATTTAGAAATGGAGGGTAAAGATATTTTTGCGTTTAAAAATATTGCGCCAGTGAATCAGCAAGAAGATGTTCCAGAA
TGAAATTAACGAAAAGAAATGAAACTGAAGATCTTTAAGCAACTGAACTCGGCAAACGTCTTTAATTACTACGAGAAGG
ATGTGATTATCAAGTACTTGAAGAACACTAAATCAACTTTGTCAATAAAAATATTCCTTTTGTACCCTCATTACAAAA
TTATACAACAAGATTGAAGATCTGCGTAACACGCTTAAAGTTCTTTTGGTCAAGTCCGAAGGATAAAGAGGAGAAAGACGC
ACAAAATTTATTTGCTGAAGAATATTTACTATGGGGAGTTCCCTGAACAAATTCGTAAGAAGTCTAAAGTCTTTTTTAAAA
TTACCAACGAGGTTATCAAAATCAATAAACAGCGCAACCAGAAAACCTGGCCATTACAAATACCAGAAGTTCGAAAAATATT
GAGAAGACGGTTCAGTTGAGTATTTAGCAATTTATCCAAAGTCGTGAGATGATCAACAATCAAGACAAGAAGAGAAGAA
CACTTATATGACTTCATCCAGCAAATTTTTTTGAAGGGCTTTATCGACTACCTGAACAAGAACAACCTGAAGTACATCG
AATCTAATAATAACAATGACAACAACGATATTTTTTCGAAAATCAAAATTAATAAAGATAACAAGAAGAAATATGACAAA
ATCTTGAAAGAACATGAGAAGCATAAATCGTAATAAGGAGATCCCCACGAAATCAATGAGTTTGTGCGCGAGATTAATTT
GGGAAAGATCTTTAAATATACGAAAACCTTGAATATGTTCTATCTTATTTTTAAAGTTGTTAAATCATAAAGAGTTAACAA
ACCTTAAGGGTTCCCTGGAGAAGTATCAGAGTGTAAACAAGAAGAGACGTTTTTCAGACGAATTGGAACCTGATCAATTTG
CTTAACCTAGACAACAACCGCGTTACAGAAGATTTTCGAGCTTGGAGGCTAATGAAATCGGTAAATTTCTGGACTTTAACGA
AAATAAAAATTAAGGATCGCAAGGAGCTTAAAAAGTTTGATACCAACAAAATTTATTTTCGACGGGGAAAATATCATCAAC
ATCGTGCATCTATAACATTAATAAAGTATGGTATGTTGAACCTGCTGGAGAAGATTGCGGATAAAGCGAAGTACAAGATC
TCGTTGAAAGAGCTTAAGGAATACAGCAACAAGAAGAACGAGATTGAGAAAAACTACACTATGCAACAAAATCTTCATCG
TAAGTATGCCCGTCCGAAGAAGGATGAAAAATTTAATGACGAAGATTATAAGGAGTACGAGAAAGCGATCGGCAATATTC
AAAAATACACTCACTTGAAAAACAAAGTAGAGTTTAAATGAGTTGAATCTTTTACAAGGTTTGTGTTGAAAATTTTGCAC
CGTTTAGTAGGTTATACCAGCATCTGGGAACGTGATTTGCGCTTCCGCTTGAAGGGAGAATTTCCGGAAAACCATATAT
TGAAGAGATCTTTAATTTTGACAATCTAAAAACGTGAAATACAAGTCCGGTCAGATCGTAGAAAAGTATATTAATTTTT
ATAAGGAACGTACAAAAGACAATGTAGAAAAGCGTTCGATTTATTCGATAAAGAAGTAAAGAAGCTGAAACAAGAAAAG
AAAGACTTATACATCGCAAACATACATCGCCCACTCAACTATATTTCCACGCAAGATCAGTCTTCTGGAGGCTTGA
AAAATTTGCGTAAACGTTTGTATATGACCGCAAGCTGAAAAATGCCATTATGAAAAGCATCGTGGATATCTTGAAAGAAT
ATGGGTTTCGTAGCAACGTTCAAAATCGGCGCTGACAAGAAAATGAGATTTCAGACTCTTGAATCCGAAAAAATTTGTCCAT
TTAAAAAACCTGAAAAAAGAAATTAATGACCGACCGCAACTCCGAAGAATTATGCGAGCTTGTCAAAGTAATGTTTCGA
GTATAAAGCACTGGAGTAA
```

> Coding region for sfGFP (repression variant):

```
ATGGGATCCGTGAGCAAGCGTAAAGGCGAAGAGCTGTTCACTGGTGTGCTCCCTATTCTGGTGGAACTGGATGGTGATGT
CAACGGTCATAAGTTTTTCCGTGCGTGGCGAGGGTGAAGGTGACGCAACTAATGGTAAACTGACGCTGAAGTTCATCTGTA
CTACTGGTAAACTGCCGGTACCCTGGCCGACTCTGGTAACGACGCTGACTTATGGTGTTCAGTGCTTTGCTCGTTATCCG
GACCATATGAAGCAGCATGACTTCTTCAAGTCCGCCATGCCGGAAGGCTATGTGCAGGAACGCACGATTTCTTTAAGGA
TGACGGCACGTACAAAACGCGTGCAGGAGTGAATTTGAAGGCGATACCCTGGTAAACCGCATGAGCTGAAAGGCATTG
ACTTTAAAGAAGACGGCAATATCTGGGCCATAAGCTGGAATACAATTTTAAACAGCCACAATGTTTACATCACCGCCGAT
AAACAAAAAATGGCATTAAGCGAATTTTAAATTCGCCACAACGTGGAGGATGGCAGCGTGCAGCTGGCTGATCACTA
CCAGCAAAACACTCCAATCGGTGATGGTCCGTGTTCTGCTGCCAGACAATCACTATCTGAGCACGAAAGCGTTCTGTCTA
AAGATCCGAACGAGAAACGCGATCATATGGTTCGTGAGGTTTCGTAACCGCAGCGGGCATCACGCATGGTATGGATGAA
```

CTGTACAAATAA

> 5' UTR of the mRNA coding for sfGFP (repression variant):

ATCCCTAGAGAAAGAGGAGAAATACCCG

> Coding region for sfGFP (activation variant):

ATGCACATAATCACTAGTCGTAAAGGCGAAGAGCTGTTCACTGGTGTCTGTCCTTATTCTGGTGGAACTGGATGGTGATGT  
CAACGGTCATAAGTTTTCCGTGCGTGGCGAGGGTGAAGGTGACGCAACTAATGGTAAACTGACGCTGAAGTTCATCTGTA  
CTACTGGTAAACTGCCGGTACCTTGGCCGACTCTGGTAACGACGCTGACTTATGGTGTTCAGTGCTTTGCTCGTTATCCG  
GACCATATGAAGCAGCATGACTTCTTCAAGTCCGCCATGCCGGAAGGCTATGTGCAGGAACGCACGATTTCTTTAAGGA  
TGACGGCACGTACAAAACGCGTGCAGGAAAGTGAATTTGAAGGCGATACCCTGGTAAACCGCATTGAGCTGAAAGGCATTG  
ACTTTAAAGAAGACGGCAATATCCTGGGCCATAAGCTGGAATACAATTTTAAACAGCCACAATGTTTACATCACCCCGCAT  
AAACAAAAAATGGCATTAAGCGAATTTTAAAATTCGCCACAACGTGGAGGATGGCAGCGTGCAGCTGGCTGATCACTA  
CCAGCAAAACACTCCAATCGGTGATGGTCCGTCTGCTGCCAGACAATCACTATCTGAGCACGCAAAGCGTTCTGTCTA  
AAGATCCGAACGAGAAACGCGATCATATGGTTCGTGAGTTTCGTAACCGCAGCGGGCATCACGCATGGTATGGATGAA  
CTGTACAAATAA

> 5' UTR of the mRNA coding for sfGFP (activation variant):

ACCATGAAATGCGAGCCGGGAATTGATATTGTGATTATGTGATGATTGTAAACAGAGGAGATACAAT

> sgRNA to repress the initiation of sfGFP translation (variant with 2x Cas13a motifs):

AGAGATTTAGACTACCCCAAAAACGAAGGGGACTAAAACCTCACGGATCCCATCGGGTATTTCTCCTCTGATTTAGACTA  
CCCAAAAACGAAGGGGACTAAAACATCCTTAGCGAAAGCTAAGGATTTTTTTT

> sgRNA to repress the initiation of sfGFP translation (variant with HDV ribozyme):

GATTTAGACTACCCCAAAAACGAAGGGGACTAAAACCTCACGGATCCCATCGGGTATTTCTCCTCTGGCCGGCATGGTCC  
CAGCCTCCTCGCTGGCGCCGGCTGGGCAACATGCTTCGGCATGGCGAATGGGACATCCTTAGCGAAAGCTAAGGATTTTT  
TTT

> sgRNA to repress the initiation of sfGFP translation (variant without 3' processing):

GATTTAGACTACCCCAAAAACGAAGGGGACTAAAACCTCACGGATCCCATCGGGTATTTCTCCTCTATCCTTAGCGAAAG  
CTAAGGATTTTTTTTTT

> Spacer of a non-targeting sgRNA (random sequence; from the variant with 2x Cas13a motifs):

GTATAATTCGAGTCCAACATAGGCGTAAAC

> Spacer of the sgRNA to repress the initiation of sfGFP translation (mutant 1; from the variant with 2x Cas13a motifs):

CTCACGGATCCCATCGGGTATTTCTCGTCT

> Spacer of the sgRNA to repress the initiation of sfGFP translation (mutant 2; from the variant with 2x Cas13a motifs):

CTCACGGATCCCATCGGGTATTTCTCCTCT

> Spacer of the sgRNA to repress the initiation of sfGFP translation (mutant 3; from the variant with 2x Cas13a motifs):

CTGACGGATCCCATCGGGTATTTCTCCTCT

> Spacer of the sgRNA to repress the initiation of sfGFP translation (mutant 4; from the variant with 2x Cas13a motifs):

CTGTCCGATCCCATCGGGTATTTCTCCTCT

> sgRNA to activate the initiation of sfGFP translation (variant with 2x Cas13a motifs):

AGAGATTTAGACTACCCCAAAAACGAAGGGGACTAAAACATCAATCATCACATAATCACAAATATCAATTGATTTAGACTA  
CCCCAAAACGAAGGGGACTAAAACATCCTTAGCGAAAGCTAAGGATTTTTTTTT

> Control 5' UTR of the mRNA coding for sfGFP (related to activation variant):

ACTCCGGCAAACAAACCACCGCTGGTAGCGGTGGTTTTTTTTGTTTGAAGCAGCAGATTACGCGCAGAAAAAAGGACAT  
GAAATGCGAAGAGGAGATACAAT

> RNA beacon (repression variant):

5' F/CAGAGGAGAAAUACCCGAUGGGAUCCGUGAGCUCCUCUG/3' Q

> RNA beacon (activation variant):

5' AAUUGAUUUG/T-F/GAUUAUGUGAUGAUUGUAAACAGUACAAUACACAUAAUC/3' Q

> Coding region for eBFP2 (repression variant):

ATGGTGAGCAAGGGCGAGGAGCTGTTACCGGGGTGGTGCCCATCCTGGTCGAGCTGGACGGCGACGTAAACGGCCACAA  
GTTTCAGCGTGAGGGGCGAGGGGCGATGCCACCAACGGCAAGCTGACCCTGAAGTTCATCTGCACCACCGGCAAGC  
TGCCCGTGCCCTGGCCACCCCTCGTGACCACCCCTGAGCCACGGCGTGCAGTGCTTCGCCCCTACCCCGACCACATGAAG  
CAGCAGACTTCTTCAAGTCCGCCATGCCCGAAGGCTACGTCCAGGAGCGCACCATCTTCTTCAAGGACGACGGCACCTA  
CAAGACCCGCGCCGAGGTGAAGTTCGAGGGGCGACACCCTGGTGAACCGCATCGAGCTGAAGGGCGTCAAGGAGG  
ACGGCAACATCCTGGGGCACAAGCTGGAGTACAACCTCAACAGCCACAACATCTATATCATGGCCGTCAAGCAGAAGAAC  
GGCATCAAGGTGAACCTCAAGATCCGCCACAACGTGGAGGACGGCAGCGTGCAGCTCGCCGACCACTACCAGCAGAACAC  
CCCCATCGGCGACGGCCCCGTGCTGCTGCCCGACAGCCACTACCTGAGCACCCAGTCCGTGCTGAGCAAAGACCCCAACG  
AGAAGCGGATCACATGGTCTGCTGGAGTTCGCCACCGCCCGGGATCACTCTCGGCATGGACGAGCTGTACAAGTAA

> 5' UTR of the mRNA coding for eBFP2 (repression variant):

ATTATCAAATCCAAGTAAGGAGGACAGCT

> Coding region for eBFP2 (activation variant):

ATGATAAACGAGAACCCTGGTGAGCAAGGGCGAGGAGCTGTTACCGGGGTGGTGCCCATCCTGGTCGAGCTGGACGGCGA  
CGTAAACGGCCACAAGTTCAGCGTGAGGGGCGAGGGGCGATGCCACCAACGGCAAGCTGACCCTGAAGTTCATCT  
GCACCACCGGCAAGCTGCCCGTGCCCTGGCCACCCCTCGTGACCACCCCTGAGCCACGGCGTGCAGTGCTTCGCCCCTAC  
CCCGACCACATGAAGCAGCAGACTTCTTCAAGTCCGCCATGCCCGAAGGCTACGTCCAGGAGCGCACCATCTTCTTCAA  
GGACGACGGCACCTACAAGACCCGCGCCGAGGTGAAGTTCGAGGGGCGACACCCTGGTGAACCGCATCGAGCTGAAGGGCG  
TCGACTTCAAGGAGGACGGCAACATCCTGGGGCACAAGCTGGAGTACAACCTCAACAGCCACAACATCTATATCATGGCC  
GTCAAGCAGAAGAACGGCATCAAGGTGAACCTCAAGATCCGCCACAACGTGGAGGACGGCAGCGTGCAGCTCGCCGACCA  
CTACCAGCAGAACACCCCATCGGCGACGGCCCCGTGCTGCTGCCCGACAGCCACTACCTGAGCACCCAGTCCGTGCTGA  
GCAAAGACCCCAACGAGAAGCGGATCACATGGTCTGCTGGAGTTCGCCACCGCCCGGGATCACTCTCGGCATGGAC  
GAGCTGTACAAGTAA

> 5' UTR of the mRNA coding for eBFP2 (activation variant):



ACCATGAAATGCGTCTTATCTTATCTATCTCGTTTATCCCTGCATACAGAAACAGAGGAGATATGCA

> sgRNA to repress the initiation of eBFP2 translation (variant with 2x Cas13a motifs):

AGAGATTTAGACTACCCCAAAAACGAAGGGGACTAAAACCGCCCTTGCTCACCATAGCTGTCCTCCTTAGATTTAGACTA  
CCCAAAAACGAAGGGGACTAAAACATCCTTAGCGAAAGCTAAGGATTTTTTTTT

> sgRNA to activate the initiation of eBFP2 translation (variant with 2x Cas13a motifs):

AGAGATTTAGACTACCCCAAAAACGAAGGGGACTAAAACGTATGCAGGGATAAACGAGATAGATAAGATGATTTAGACTA  
CCCAAAAACGAAGGGGACTAAAACATCCTTAGCGAAAGCTAAGGATTTTTTTTT

## ADDITIONAL FIGURES

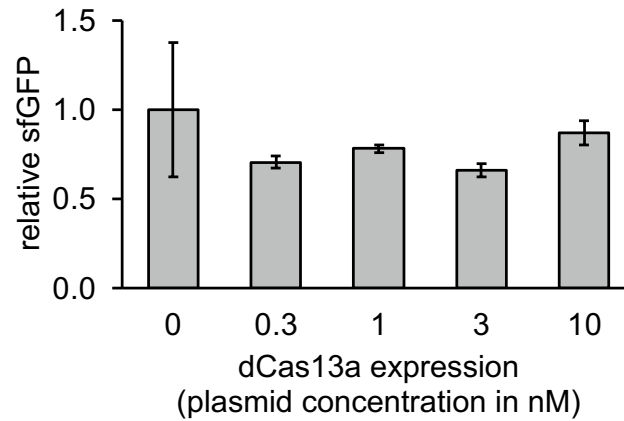

**Fig. S1:** Impact of dCas13a expression on sfGFP expression in the myTXTL system. The plasmid encoding the sfGFP was placed at 2 nM. Error bars correspond to standard deviations ( $n = 3$ ). Statistical significance assessed by Spearman's correlation (two-tailed  $P = 0.91$ ).

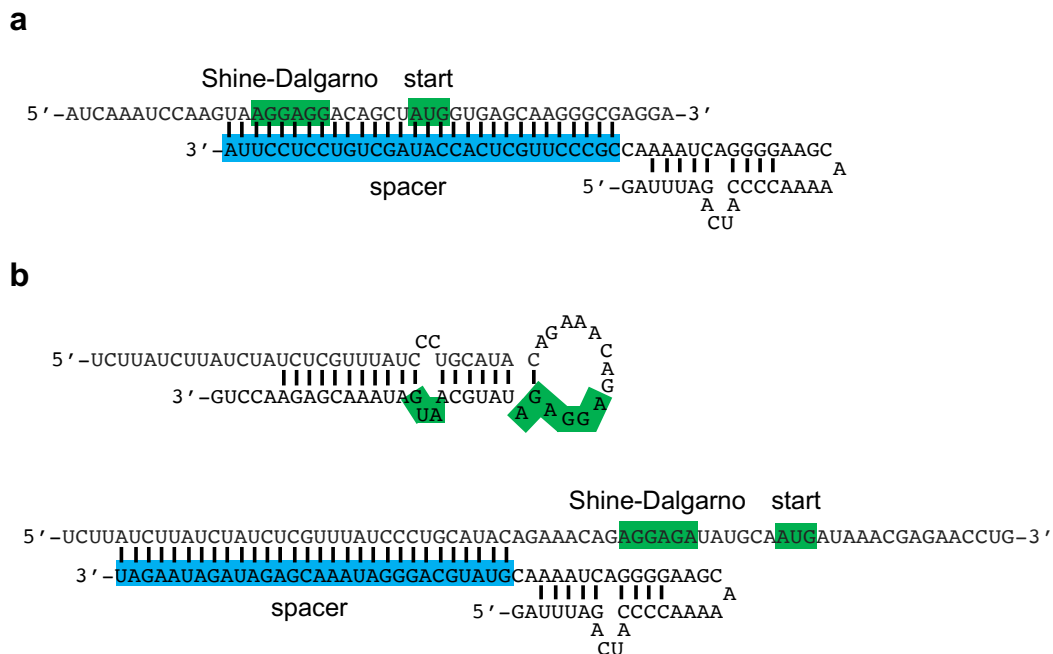

**Fig. S2:** RNA sequence and structure detail of the sgRNA-mRNA interaction for eBFP2 regulation. The Shine-Dalgarno box and the start codon are shown in green, while the spacer of the sgRNA is shown in blue. a) Repression. b) Activation.

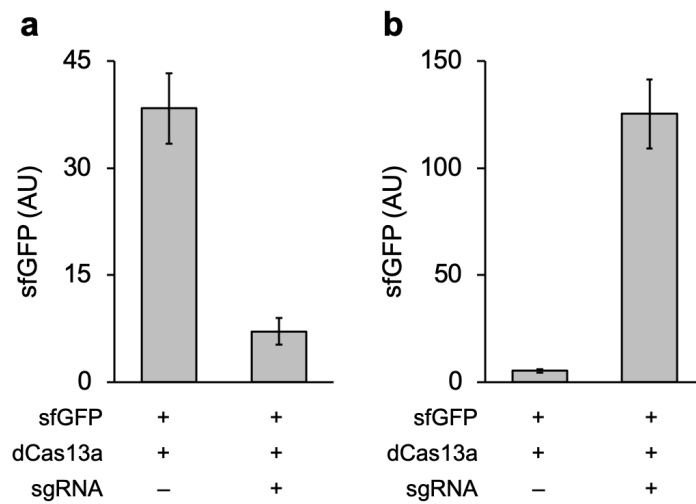

**Fig. S3:** a) Quantification of the green fluorescence of the colonies from Fig. 1i, the case of repression. b) Quantification of the green fluorescence of the colonies from Fig. 2h, the case of activation ( $n = 5$ ).

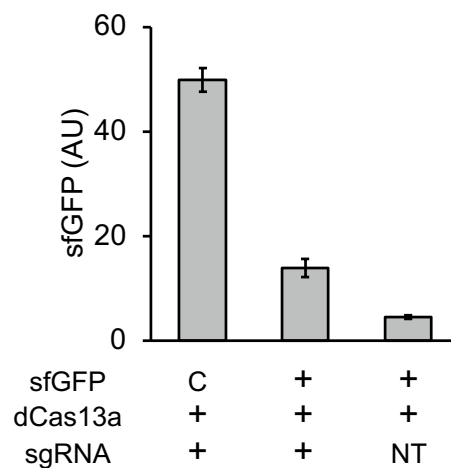

**Fig. S4:** Characterization of a control system without *cis*-repression of the Shine-Dalgarno box and the start codon to assess the maximal possible expression in the case of sfGFP activation. The positive control shows a 10-fold fluorescence increase with respect to the off state, while the designed system shows a 3-fold fluorescence increase through the action of the CRISPR-Cas13 ribonucleoprotein.
